# Supplementary material for: PPARβ/δ selectively regulates phenotypic features of age-related macular degeneration
Source: PubMed Central journal article supplement (PMC5076447; doi:10.18632/aging.101031), 2016-09-08
Supplement: aging-08-1952-s001.pdf [file aging-08-1952-s001.pdf]

SUPPLEMENTARY MATERIAL

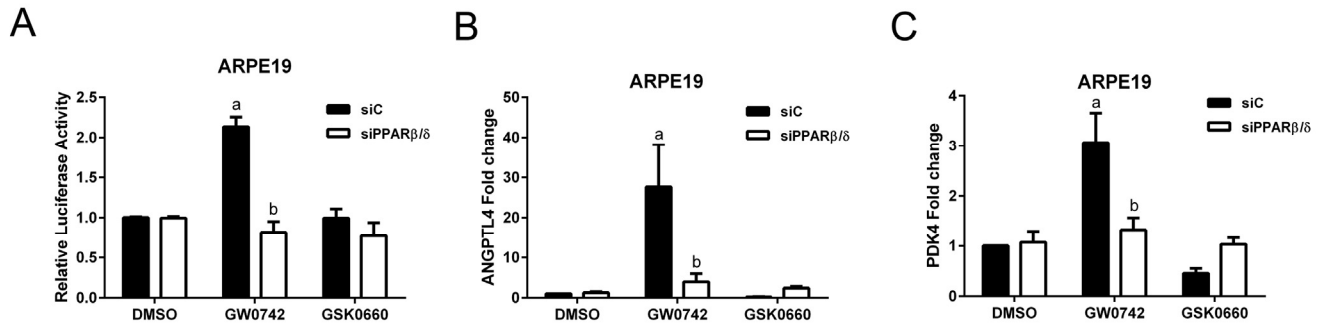

**Figure S1. PPARβ/δ signaling pathway is functional in ARPE19 cells.** (A) PPARβ/δ activity in ARPE19 cells transfected with the DR1 luciferase reporter and siC or siPPARβ/δ; cells were treated with PPARβ/δ agonist, GW0742 or antagonist, GSK0660 or DMSO as control ( $n = 3$ ): a,  $p < 0.05$  relative to DMSO treated cells; b,  $p < 0.05$  relative to drug+siC treated cells ( $p < 0.05$ ). Expression of (B) *ANGPTL4* and (C) *PDK4* mRNA in siC and siPPARβ/δ treated ARPE19 cells in response to GW0742, GSK0660, or DMSO as a control ( $n = 3$ ); a:  $p < 0.05$  relative to DMSO treated cells; b:  $p < 0.05$  relative to drug+siC treated cells.

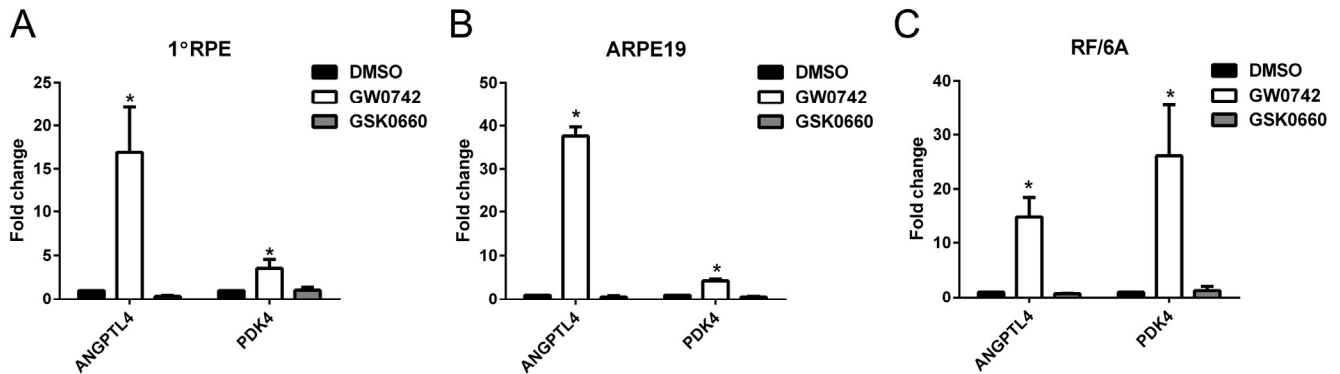

**Figure S2. PPARβ/δ agonist and antagonist treatment of AMD vulnerable cells in the absence of transfection differentially effect receptor target gene expression.** Human primary RPE (1°RPE); (A), ARPE19 (B), and RF/6A (C) cells were treated with GW0742 (10μM) and GSK0660 (10μM) for 24 hours, using DMSO as control. mRNA levels of the PPARβ/δ target genes *ANGPTL4* and *PDK4* were measured using qRT-PCR ( $n=3$ ,  $p<0.05$ ).

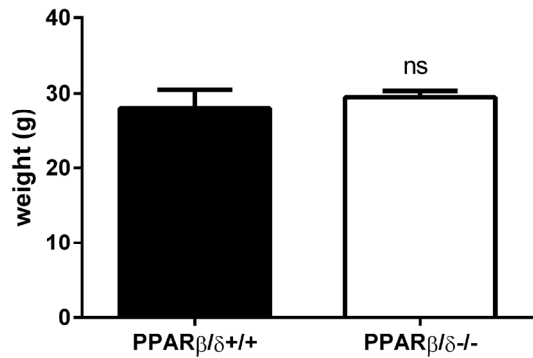

**Figure S3. Comparison of body weights of age-matched *Pparβ/δ*<sup>+/+</sup> and *Pparβ/δ*<sup>-/-</sup> mice.** Average weights of mice from *Pparβ/δ*<sup>+/+</sup> (n=7) and *PPARβ/δ*<sup>-/-</sup> (n=4) cohorts. (mean and S.E.M., ns: not significant).

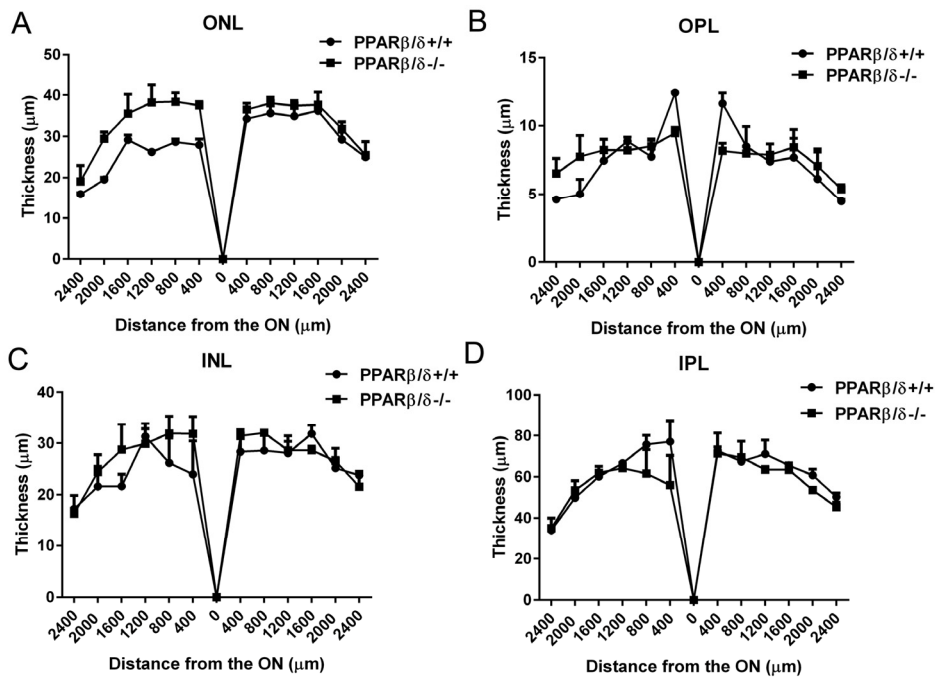

**Figure S4. Quantification of thickness of retinal layers of *Pparβ/δ*<sup>+/+</sup> and *Pparβ/δ*<sup>-/-</sup> mice.** Toluidine blue stained retinal sections were imaged from age matched *Pparβ/δ*<sup>+/+</sup> (n=3) and *Pparβ/δ*<sup>-/-</sup> (n=2) mice at 20X from end to end and images were tiled to create complete retinal section images. Six equidistant measurements of (A) outer nuclear layer (ONL) (B) outer plexiform layer (OPL), (C) inner nuclear layer (INL), and (D) inner plexiform layer (IPL) towards each end were made from the optic nerve. The thickness of these layers was plotted. Tiled images demonstrating overall retinal morphology of (E) *Pparβ/δ*<sup>+/+</sup> and (F) *Pparβ/δ*<sup>-/-</sup> mice.

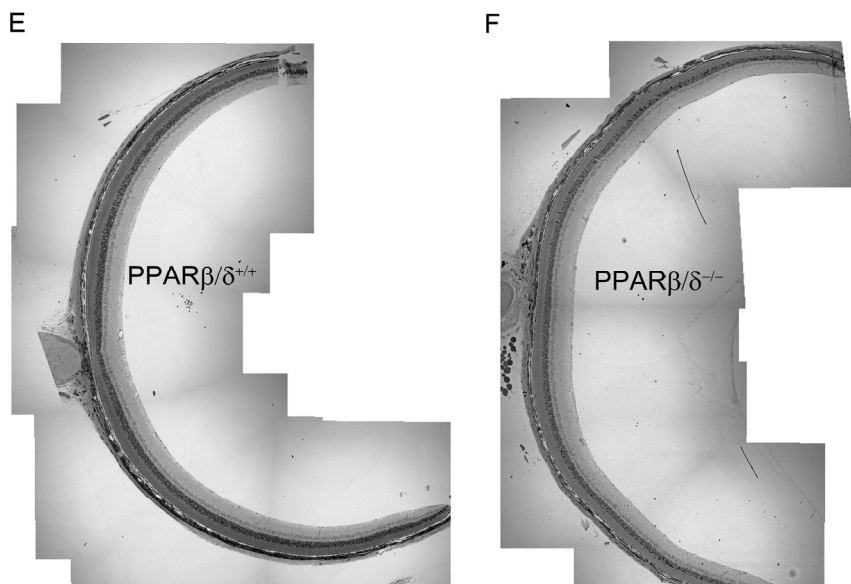

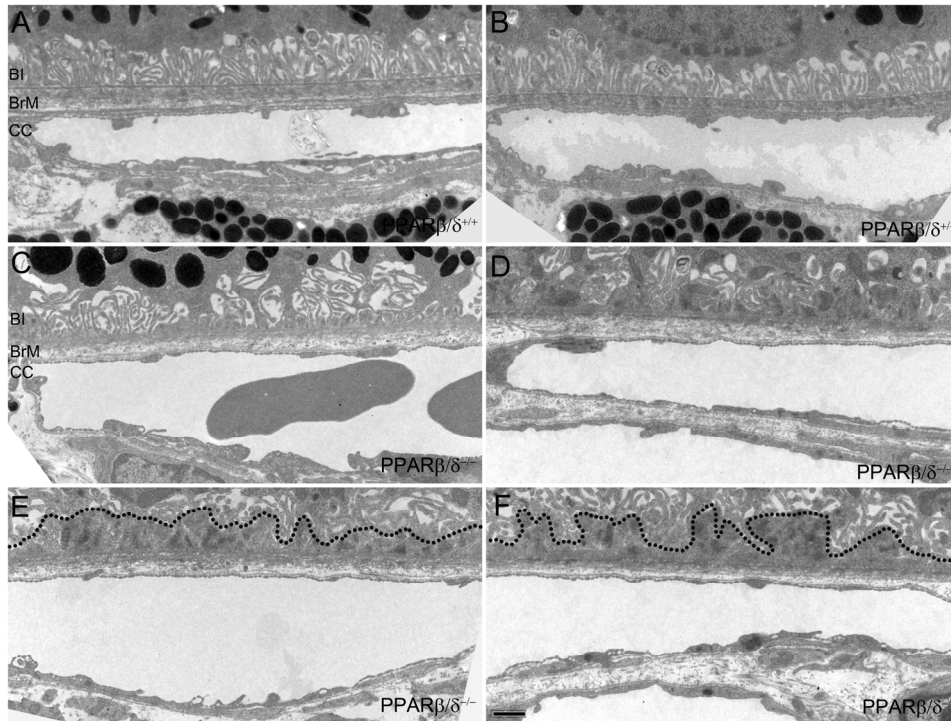

**Figure S5. Genetic ablation of *Pparβ/δ* does not affect the integrity of the choriocapillaris.** Morphology of the choriocapillaris was examined in electron micrographs. (A, B) Normal organization of the basal infolding of the RPE, Bruch's membrane (BrM) and fenestrated choriocapillaries (CC) in *Pparβ/δ*<sup>+/+</sup> mice (n=4). (C, D, E, F) Sub-RPE deposits, disorganized basal infoldings of the RPE above morphologically normal looking fenestrated choriocapillaries. Apical limit of the sub-RPE deposits is outlined by a dotted line. N=8-14 images/mouse, n=4 mice/genotype were examined. Scale bar: 1 μm.

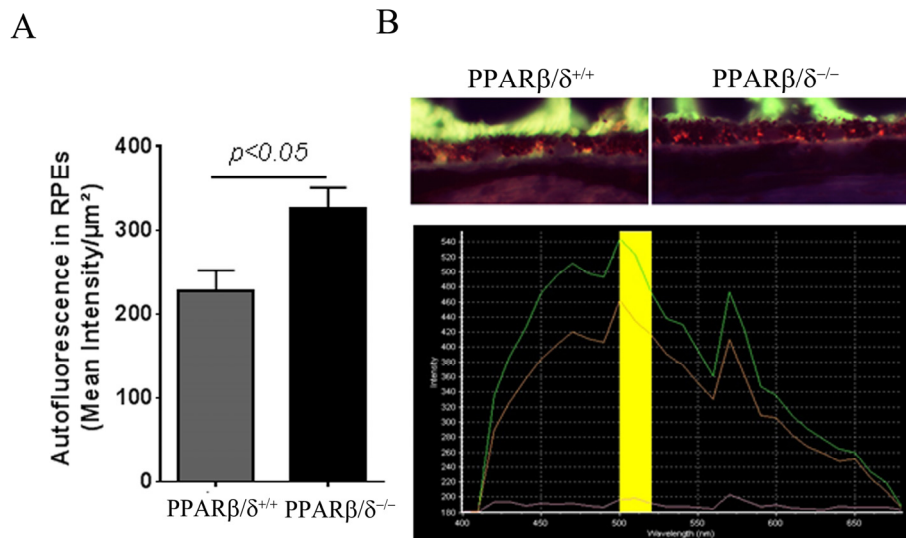

**Figure S6. Genetic disruption of *Pparβ/δ* leads to lipofuscin accumulation *in vivo*.** RPE autofluorescence was measured in *Pparβ/δ*<sup>+/+</sup> and *Pparβ/δ*<sup>-/-</sup> mice. (A) Quantification of lipofuscin autofluorescence in RPE from *Pparβ/δ*<sup>+/+</sup> and *Pparβ/δ*<sup>-/-</sup> mice. (B) Representative images and (C) plot of intensity versus wavelength of cryosections from *Pparβ/δ*<sup>+/+</sup> and *Pparβ/δ*<sup>-/-</sup> mice.

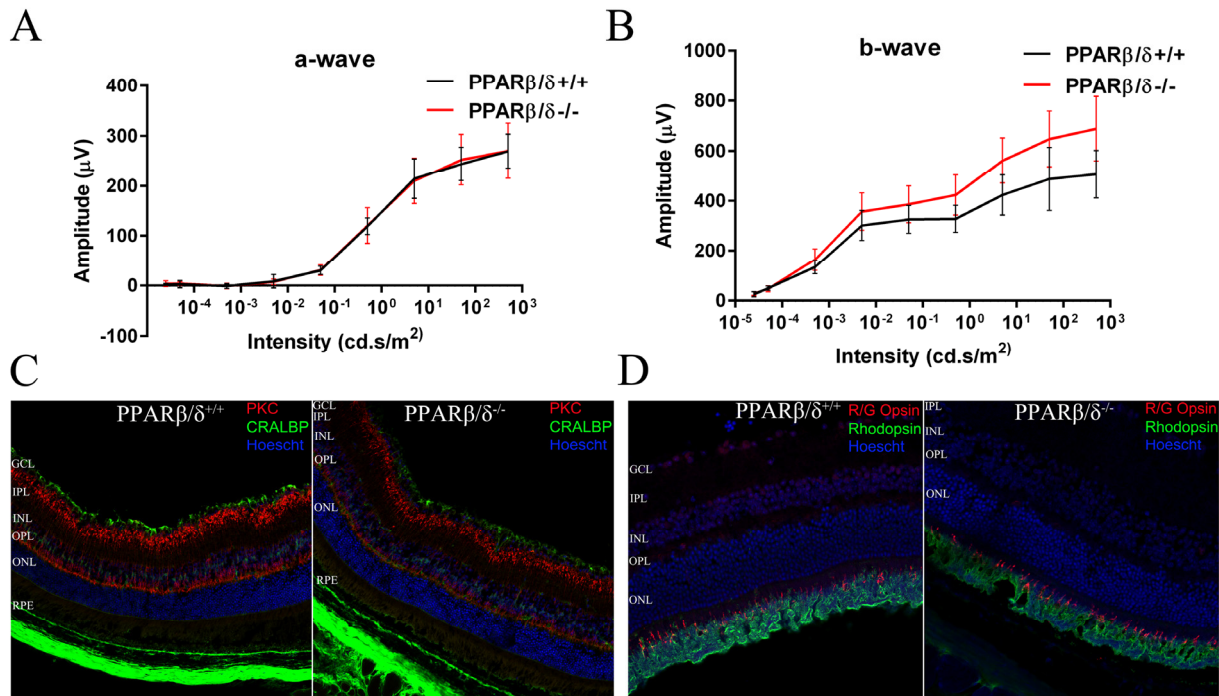

**Figure S7. *Pparβ/δ*<sup>-/-</sup> mice exhibit comparative ERG responses to age-matched *Pparβ/δ*<sup>+/+</sup> mice.** Averaged ERG responses in 14-16 month old dark-adapted *Pparβ/δ*<sup>+/+</sup> (black) (n=5) and *Pparβ/δ*<sup>-/-</sup> mice (red) (n=6). Plots of (A) dark-adapted a-wave amplitudes and (B) b-wave amplitudes as a function of flash intensity. Data points are mean and S.E.M. Immunolocalization of retinal markers in cryosections from 18-month old *Pparβ/δ*<sup>+/+</sup> and *Pparβ/δ*<sup>-/-</sup> mice probed with antibodies for (C) rod bipolar cells (PKCα, red) and Müller cells (CRALBP, green) and (D) red-green cone photoreceptors (R/G opsin, red) and rod photoreceptors (rhodopsin, green). Nuclei are stained with Hoescht (blue).

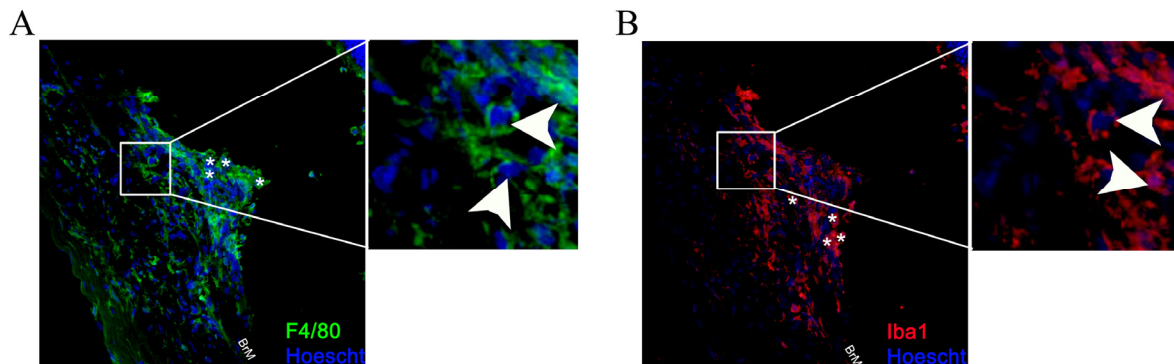

**Figure S8. High magnification view of Iba1 and F4/80 staining in laser CNV lesions.** Laser CNV lesions from *Pparβ/δ*<sup>-/-</sup> mice display distinct F4/80 (green) (A) and Iba1 (red) (B) immunopositive cells. White arrowheads depict individual cells stained with F4/80 or Iba1. Asterisks mark some additional examples of positively stained cells.

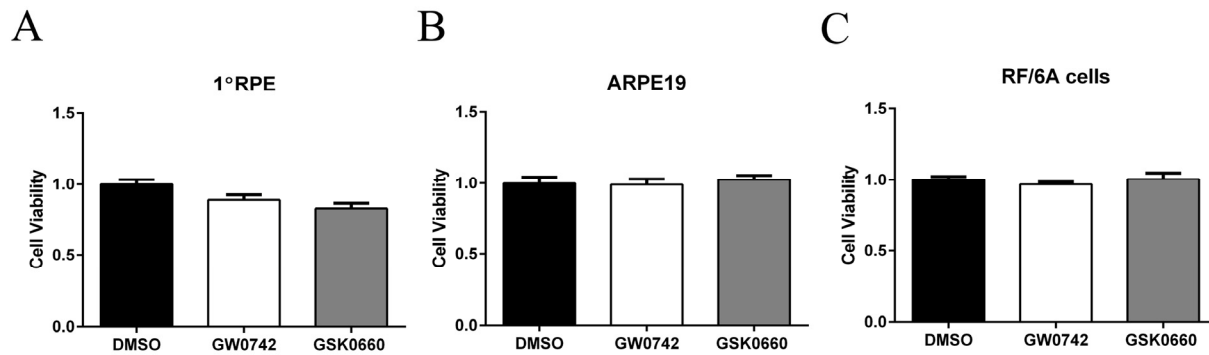

**Figure S9. Ligand activation or pharmacological antagonism of PPAR $\beta/\delta$  does not affect cell viability in cell-culture models.** Cell viability was measured after a 4 day treatment with the PPAR $\beta/\delta$  agonist, GW0742 or antagonist, GSK0660 in (A) primary RPE cells, (B) ARPE19 and (C) RF/6A cells.

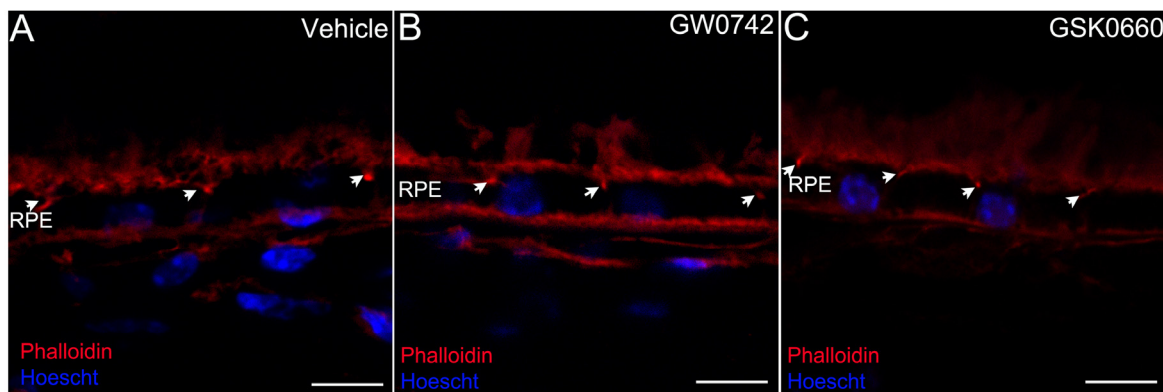

**Figure S10. Ligand activation or pharmacological antagonism of PPAR $\beta/\delta$  does not affect RPE tight junctions *in vivo*.** Localization of phalloidin (red) in cross-sections from mice treated with (A) vehicle control (1% DMSO in saline), (B) GW0742 (0.5mg/kg/day, i.p.), or (C) GSK0660 (1m/kg/day, i.p.). Apical localization is indicated by white arrows. Hoescht was used to stain nuclei.

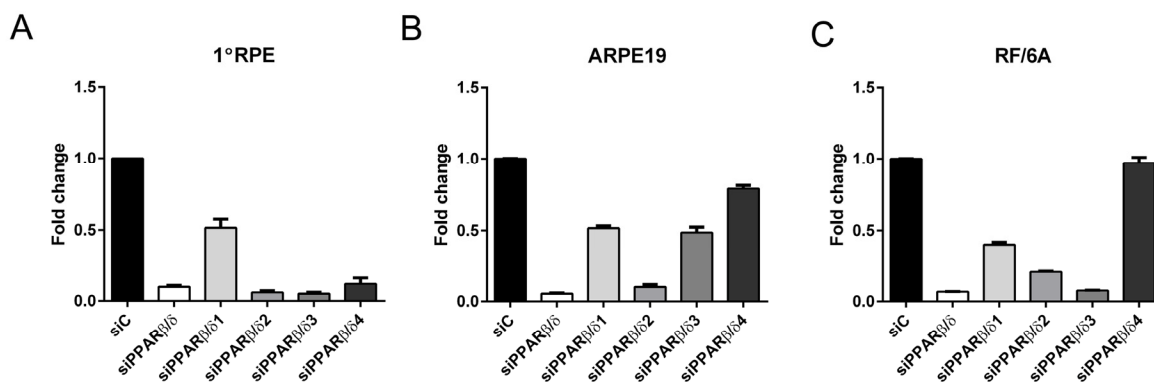

**Figure S11. Validation of PPAR $\beta/\delta$  knockdown in cell-culture models.** Multiple siRNAs targeting PPAR $\beta/\delta$  listed in Table S2 were tested in cell culture models used in this study. RT-PCR was used to measure the expression of PPAR $\beta/\delta$  mRNA levels 24 hours after siRNA transfection. Effect of siRNA transfection on PPAR $\beta/\delta$  gene expression in (A) primary RPE cells, (B) ARPE19 and (C) RF/6A cells. siC, control siRNA; siPPAR $\beta/\delta$ , PPAR $\beta/\delta$  siRNA.

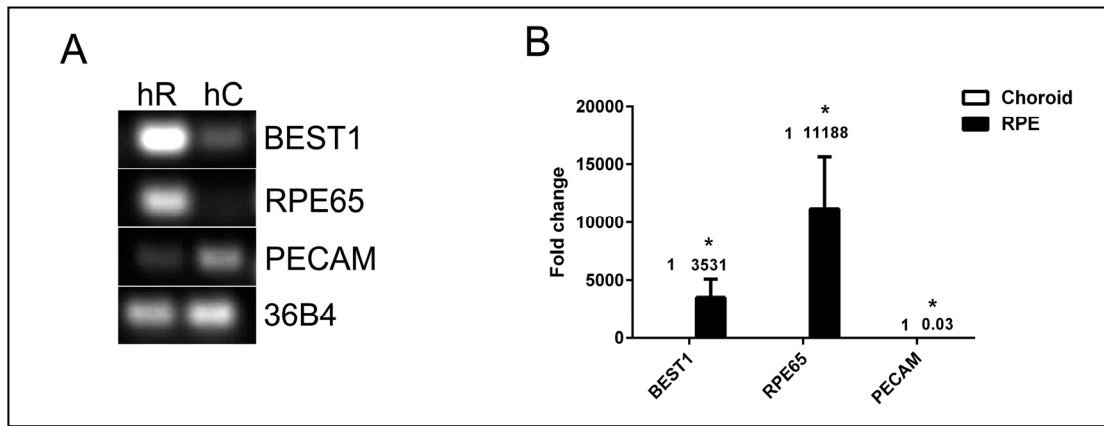

**Figure S12. Freshly isolated RPE and choroid from human donor eyes have minimal cross contamination.** mRNA expression of *BEST1*, *RPE65* and *PECAM* in freshly isolated RPE cells relative to freshly isolated choroidal cells (A, n=3, p<0.05), The mean fold change for each gene is depicted on the graph (B).

**Table S1. List of drugs, concentrations, and sources.**

| Drugs   | Concentration | Source        |
|---------|---------------|---------------|
| GW0742  | 10 $\mu$ M    | Sigma-Aldrich |
| GSK0660 | 10 $\mu$ M    | Sigma-Aldrich |

**Table S2. List of siRNAs.**

| siRNA                       | Company   | Catalog#         |
|-----------------------------|-----------|------------------|
| siC                         | Qiagen    | 1027281          |
| siPPAR $\beta$ / $\delta$   | Dharmacon | L-003435-00-0005 |
| siPPAR $\beta$ / $\delta$ 1 | Dharmacon | J-003435-06      |
| siPPAR $\beta$ / $\delta$ 2 | Dharmacon | J-003435-07      |
| siPPAR $\beta$ / $\delta$ 3 | Dharmacon | J-003435-08      |
| siPPAR $\beta$ / $\delta$ 4 | Dharmacon | J-003435-09      |

**Table S3. List of primers.**

| Gene            | Primers | Sequence 5'→3' Human     |
|-----------------|---------|--------------------------|
| <b>36B4</b>     | Forward | GGACATGTTGCTGGCCAATAA    |
|                 | Reverse | GGGCCCCGAGACCAGTGTT      |
| <b>ANGPTL4</b>  | Forward | GTCCACCGACCTCCCGTT A     |
|                 | Reverse | CCTCATGGTCTAGGTGCTTGT    |
| <b>BEST1</b>    | Forward | AACTGAGCCTACCACACAACA    |
|                 | Reverse | CGGATTCGACCTCCAAGCC      |
| <b>COLA1</b>    | Forward | TCACCAGGACAGAAGGGAAG     |
|                 | Reverse | CTCTGGCACCTTTTGCTAGG     |
| <b>COL4A4</b>   | Forward | CTGGATTTGGAGAACGTACCG    |
|                 | Reverse | TGATCCAATTCTGCCTGCAC     |
| <b>FN1</b>      | Forward | ATGATGAGGTGCACGTGTGT     |
|                 | Reverse | CTCTTCATGACGCTTGTGGA     |
| <b>PDGFRB</b>   | Forward | AGCACCTTCGTTCTGACCTG     |
|                 | Reverse | TATTCTCCCGTGTCTAGCCCA    |
| <b>PDK4</b>     | Forward | GGAGCATTCTCGCGCTACA      |
|                 | Reverse | ACAGGCAATTCTTGTGCGAAA    |
| <b>PECAM1</b>   | Forward | AACAGTGTTGACATGAAGAGCC   |
|                 | Reverse | TGTA AACAGCAGCAGTCATCCTT |
| <b>PPARD</b>    | Forward | CCAACAGATGAAGACAGATGCA   |
|                 | Reverse | CTGAACGCAGATGGACCTCTA    |
| <b>RPE65</b>    | Forward | CCTGCTGGTGGTTACAAGAAA    |
|                 | Reverse | CCTGCCTGTTACATGAGCTGT    |
| <b>RXRA</b>     | Forward | GAGCCCAAGACCGAGACCTA     |
|                 | Reverse | AGCTGTTTGTGCGCTGCTT      |
| <b>RXRB</b>     | Forward | AGCCCCAGATTA ACTCAACA    |
|                 | Reverse | GATTGCACATAGCCGTTTGC     |
| <b>SERPINF1</b> | Forward | TTCAAAGTCCCCGTGAACAAG    |
|                 | Reverse | GAGAGCCCCGGTGAATGATGG    |
| <b>TGFB1</b>    | Forward | CAATTCCTGGCGATACCTCAG    |
|                 | Reverse | AGATAACCACTCTGGCGAGTC    |
| <b>VEGFA</b>    | Forward | AGGGCAGAATCATCACGAAGT    |
|                 | Reverse | AGGGTCTCGATTGGATGGCA     |
| <b>VTN</b>      | Forward | CACTATGCCGGAGGATGAGT     |
|                 | Reverse | TCAGGATTCCCTTTGGACTG     |

**Table S4. List of drugs, concentrations, and sources.**

| Antibody/Stain                                    | Source                                      | Dilution |
|---------------------------------------------------|---------------------------------------------|----------|
| Apolipoprotein E (ApoE)                           | Millipore                                   | 1:1000   |
| Collagen IV (COL4)                                | Millipore                                   | 1:30     |
| CRALBP                                            | Gift from John C Saari and<br>Thermo Fisher | 1:2500   |
| F4/80                                             | AbD Serotec                                 | 1:500    |
| Fibronectin (FN1)                                 | Abcam                                       | 1:100    |
| Iba1 (Ionized calcium-binding adapter molecule 1) | WAKO                                        | 1:200    |
| PKC $\alpha$                                      | Abcam                                       | 1:200    |
| Red-Green Opsin                                   | Millipore                                   | 1:1000   |
| Rhodopsin                                         | Abcam                                       | 1:1000   |
| SV2                                               | Hybridoma bank                              | 1:200    |
| Phalloidin Tetramethylrhodamine B isothiocyanate  | Sigma                                       | 1:500    |
